# Supplementary material for: Serum Proteomic and Oxidative Modification Profiling in Mice Exposed to Total Body X-Irradiation
Source: MDPI journal article supplement (doi:10.3390/antiox11091710), 2022-08-30
Supplement: s1 [file s1]

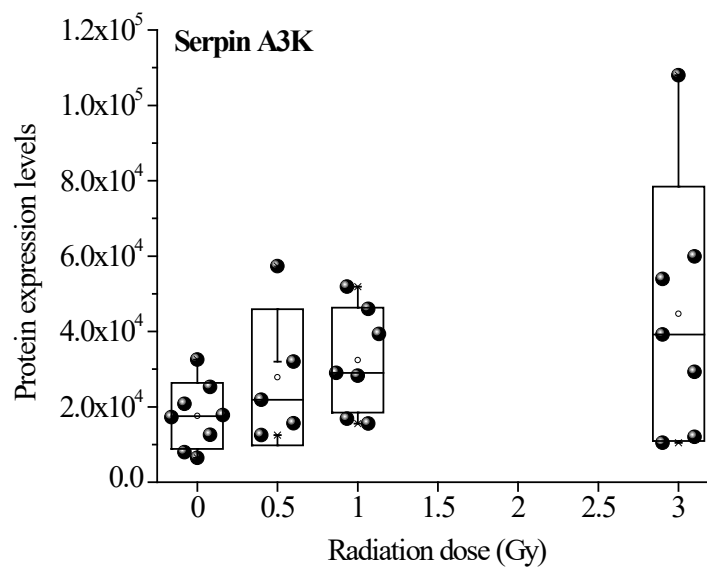

**Supplemental Figure S1. Correlation between the Serpin A3K expression levels with single TBI and the radiation dose.** A weak dose-dependent correlation was observed when the expression of serine protease inhibitor A3K (Serpin A3K) in non-TBI and TBI mice were compared. Linear ( $r=0.42$ ,  $p=0.0176$ ), polynormal (n.s.).
