# Supplementary material for: Serum Proteomic and Oxidative Modification Profiling in Mice Exposed to Total Body X-Irradiation
Source: MDPI journal article supplement (doi:10.3390/antiox11091710), 2022-08-30
Supplement: s1 [file s1]

Supplemental Table S1. Oxidative modification pattern of peptide sequence constituting serum albumin in mice exposed to acute high dose/dose-rate radiation

| mOMSA ID | Peptide sequence and modification site         | Residue number | Modification | Modification type    |
|----------|------------------------------------------------|----------------|--------------|----------------------|
| 01       | YNDLGEQHF[Oxi]K                                | 43             | F[Oxi]       | Oxidation            |
| 02       | YNDLGEQHF[2Ox]                                 | 44             | K[2Ox]       | Oxidation            |
| 03       | GLVLIAFSQY[Ntr]LQK                             | 54             | Y[Ntr]       | Nitro-tyrosin        |
| 04       | GLVLIAFSQY[Oxi]LQK                             | 54             | Y[Oxi]       | Oxidation            |
| 05       | GLVLIAFSQYLQK[AAA]                             | 57             | K[AAA]       | Lys->Aminoadipicacid |
| 06       | GLVLIAFSQYLQK[LAA]                             | 57             | K[LAA]       | Lys->Allysine        |
| 07       | LVQEVTDFAK[LAA]TC[CAM]VADESAANC[CAM]DK         | 75             | K[LAA]       | Lys->Allysine        |
| 08       | TC[CAM]VADESAANC[CAM]D[Oxi]K                   | 87             | D[Oxi]       | Oxidation            |
| 09       | SLHTLFGDK[LAA]LC[CAM]AIPNLR                    | 97             | K[LAA]       | Lys->Allysine        |
| 10       | SLHTLFGDK[2Ox]LC[CAM]AIPNLR                    | 97             | K[2Ox]       | Oxidation            |
| 11       | QEPER[2Ox]NEC[CAM]FLQHK                        | 122            | R[2Ox]       | Oxidation            |
| 12       | DDNPSLPPFERPEAEAM[Oxi]C[CAM]TSFK               | 147            | M[Oxi]       | Oxidation            |
| 13       | DDNPSLPPFERPEAEAM[2Ox]C[CAM]TSFK               | 147            | M[2Ox]       | Oxidation            |
| 14       | ENPTTFM[Oxi]GHYLFHEVAR                         | 159            | M[Oxi]       | Oxidation            |
| 15       | ENPTTFM[2Ox]GHYLFHEVAR                         | 159            | M[2Ox]       | Oxidation            |
| 16       | C[CAM]SSMQK[LAA]FGER                           | 229            | K[LAA]       | Lys->Allysine        |
| 17       | LSQTF[Oxi]PNADFAEITK                           | 247            | F[Oxi]       | Oxidation            |
| 18       | VNK[LAA]EC[CAM]C[CAM]HGDLLC[CAM]ADDR           | 267            | K[LAA]       | Lys->Allysine        |
| 19       | EC[CAM]C[CAM]HGDLLC[CAM]AD[Oxi]DR              | 279            | D[Oxi]       | Oxidation            |
| 20       | Y[2Ox]MC[CAM]ENQATISSK                         | 287            | Y[2Ox]       | Oxidation            |
| 21       | Y[Oxi]MC[CAM]ENQATISSK                         | 287            | Y[Oxi]       | Oxidation            |
| 22       | LQTC[CAM]C[CAM]DKP[Oxi]LLK                     | 306            | P[Oxi]       | Oxidation            |
| 23       | K[AAA]AHC[CAM]LSEVEHDTMPADLPAIAADFVEDQEV[CAM]K | 310            | K[AAA]       | Lys->Aminoadipicacid |
| 24       | K[LAA]AHC[CAM]LSEVEHDTMPADLPAIAADFVEDQEV[CAM]K | 310            | K[LAA]       | Lys->Allysine        |
| 25       | K[Oxi]AHC[CAM]LSEVEHDTMPADLPAIAADFVEDQEV[CAM]K | 310            | K[Oxi]       | Oxidation            |
| 26       | AHC[CAM]LSEVEHDTM[Oxi]PADLPAIAADFVEDQEV[CAM]K  | 322            | M[Oxi]       | Oxidation            |
| 27       | AHC[CAM]LSEVEHDTM[2Ox]PADLPAIAADFVEDQEV[CAM]K  | 322            | M[2Ox]       | Oxidation            |
| 28       | RHP[Oxi]DYSVSLLLR                              | 363            | P[Oxi]       | Oxidation            |
| 29       | C[CAM]C[CAM]AEANP[2Ox]PAC[CAM]YGTVLAEFQPLVEEPK | 390            | P[2Ox]       | Oxidation            |
| 30       | NLVK[LAA]TNC[CAM]DLYEK                         | 413            | K[LAA]       | Lys->Allysine        |
| 31       | LGEY[2Ox]GFQNAILVR                             | 425            | Y[2Ox]       | Oxidation            |
| 32       | LGEY[Ntr]GFQNAILVR                             | 425            | Y[Ntr]       | Nitro-tyrosin        |
| 33       | LGEY[Oxi]GFQNAILVR                             | 425            | Y[Oxi]       | Oxidation            |
| 34       | YTQK[LAA]APQVSTPTLVEAAR                        | 438            | K[LAA]       | Lys->Allysine        |
| 35       | YTQKAP[Oxi]QVSTPTLVEAAR                        | 440            | P[Oxi]       | Oxidation            |
| 36       | VGTK[LAA]C[CAM]C[CAM]TLPEDQR                   | 460            | K[LAA]       | Lys->Allysine        |
| 37       | C[CAM]C[CAM]TLP[Oxi]EDQR                       | 465            | P[Oxi]       | Oxidation            |
| 38       | LPC[CAM]VEDY[2Ox]LSAILNR                       | 476            | Y[2Ox]       | Oxidation            |
| 39       | LPC[CAM]VEDY[Ntr]LSAILNR                       | 476            | Y[Ntr]       | Nitro-tyrosin        |
| 40       | LPC[CAM]VEDY[Oxi]LSAILNR                       | 476            | Y[Oxi]       | Oxidation            |
| 41       | TPVSEHVT[LAA]C[CAM]C[CAM]SGSLVER               | 499            | K[LAA]       | Lys->Allysine        |
| 42       | TPVSEHVT[Oxi]C[CAM]C[CAM]SGSLVER               | 4999           | K[Oxi]       | Oxidation            |
| 43       | ATAEQLKTVM[Oxi]DDFAQFLDTC[CAM]C[CAM]K          | 572            | M[Oxi]       | Oxidation            |
| 44       | TVMDDF[Oxi]AQFLDTC[CAM]C[CAM]K                 | 575            | F[Oxi]       | Oxidation            |
| 45       | AADK[AAA]DTC[CAM]FSTEGPNLVTR                   | 588            | K[AAA]       | Lys->Aminoadipicacid |
| 46       | AADK[LAA]DTC[CAM]FSTEGPNLVTR                   | 588            | K[LAA]       | Lys->Allysine        |
| 47       | AADKDTC[CAM]F[Oxi]STEGPNLVTR                   | 592            | F[Oxi]       | Oxidation            |
| 48       | AADKDTC[CAM]F[2Ox]STEGPNLVTR                   | 592            | F[2Ox]       | Oxidation            |

*Note* . Starting on the left column, you can see “mouse OMSA (oxidative modification of serum albumin) ID”, “the Peptide sequence constituting serum albumin and its modification site”, and “the Modification type”, respectively.
